# Natural combinatorial genetics and prolific polyamine production enable siderophore diversification in *Serratia plymuthica*

Sara Cleto<sup>1,2,3</sup>, Kristina Haslinger<sup>3,4,5</sup>, Kristala L.J. Prather<sup>3,4</sup> and Timothy K. Lu<sup>1,2,3\*</sup>

<sup>1</sup>Department of Electrical Engineering and Computer Science, Massachusetts Institute of Technology

<sup>2</sup>Department of Biological Engineering, Massachusetts Institute of Technology

<sup>3</sup>Synthetic Biology Center, Massachusetts Institute of Technology

<sup>4</sup>Department of Chemical Engineering, Massachusetts Institute of Technology

<sup>5</sup>Department of Chemical and Pharmaceutical Biology, University of Groningen

\* Timothy K. Lu

**Email:** timlu@mit.edu

## **Classification**

Biological Sciences, Applied Biological Sciences.

## **Keywords**

Natural products, siderophores, pathway elucidation, polyamines.

## **Author Contributions**

SC and TKL conceived the study. SC generated the knock-out strains and performed the experiments. KH performed HPLC analysis and homology modeling. SC wrote the manuscript with contributions of all authors. All authors read and approved the manuscript.

## 1 Abstract

2 Siderophores are small molecules with unmatched capacity to scavenge iron from proteins and  
3 the extracellular milieu, where it mostly occurs as insoluble Fe<sup>3+</sup>. Siderophores chelate Fe<sup>3+</sup> for  
4 uptake into the cell, where it is reduced to soluble Fe<sup>2+</sup>. As iron is essential for bacterial survival,  
5 siderophores are key molecules in low soluble iron conditions. Bacteria have devised many  
6 strategies to synthesize proprietary siderophores to avoid siderophore piracy by competing  
7 organisms, e.g., by incorporating different polyamine backbones into siderophores, while  
8 maintaining the catechol moieties. We report that *Serratia plymuthica* V4 produces a variety of  
9 siderophores, which we term the *siderome*, and which are assembled by the concerted action of  
10 enzymes encoded in two independent gene clusters. Besides assembling serratiochelin with  
11 diaminopropane, *S. plymuthica* utilizes putrescine and the same set of enzymes to assemble  
12 photobactin, a siderophore described for *Photorhabdus luminescens*. The enzymes encoded by  
13 one of the gene clusters can independently assemble enterobactin. A third, independent operon  
14 is responsible for biosynthesis of the hydroxamate siderophore aerobactin, initially described in  
15 *Enterobacter aerogenes*. Mutant strains not synthesizing polyamine-siderophores significantly  
16 increased enterobactin production levels, though lack of enterobactin did not impact  
17 serratiochelin production. Knocking out SchF0, an enzyme involved in the assembly of  
18 enterobactin alone, significantly reduced bacterial fitness. This study illuminates the interplay  
19 between siderophore biosynthetic pathways and polyamine production superpathways,  
20 indicating routes of molecular diversification. Given its natural yields of diaminopropane (97.75  
21 μmol/g DW) and putrescine (30.83 μmol/g DW), *S. plymuthica* can be exploited for the industrial  
22 production of these compounds.

## 23 Significance Statement

24 Siderophores are molecules crucial for bacterial survival in low iron environments. Bacteria have  
25 evolved the capacity to pirate siderophores made by other bacterial strains and to diversify the  
26 structure of their own siderophores, to prevent piracy. We found that *Serratia plymuthica* V4  
27 produces five different siderophores using three gene clusters and a polyamine production  
28 superpathway. The most well studied siderophore, enterobactin, rather than the strain's  
29 proprietary and by far most abundant siderophore, serratiochelin, displayed a crucial role in the  
30 fitness of *S. plymuthica*. Our results also indicate that this strain is a good candidate for  
31 engineering the large-scale production of diaminopropane (DAP), as without any optimization it  
32 produced the highest amounts of DAP reported for wild-type strains.

## 33 Main Text

### 34 Introduction

35 Iron, one of the most abundant elements on Earth (1), is crucial for the survival of all living  
36 organisms, including bacteria. It occurs in two forms: soluble ( $\text{Fe}^{2+}$ ) and insoluble ( $\text{Fe}^{3+}$ ). Soluble  
37 iron can be readily taken up by aerobic microorganisms (but not anaerobes), although it is  
38 uncommon at pH 7 (2–4). Bacteria and most life forms have evolved a diversity of ways that  
39 converge to the same goal: obtaining soluble iron ( $\text{Fe}^{2+}$ ) for survival. They have devised complex  
40 regulatory mechanisms responding to  $\text{Fe}^{2+}$  unavailability that induce the expression of a series of  
41 genes to produce small iron chelators, termed siderophores (5–8), secrete them, and take up their  
42 iron-bound forms. Bacteria have not only devised ways of biosynthesizing “proprietary”  
43 siderophore molecules, but have evolved transport mechanisms that allow them to utilize foreign  
44 siderophores, or xenosiderophores, as well (9, 10). This mechanism has led siderophores to be  
45 considered public goods, traded between bacteria and impacting their survival (11–15). As with  
46 any public good, some users benefit from it without having contributed to its production, which  
47 comes at a cost to the producer (15). Along these lines, some bacteria have evolved extraordinary  
48 ways to synthesize proprietary siderophores that require the expression of specialized TonB-  
49 dependent receptors (TBDRs). These receptors allow for efficient siderophore uptake by the  
50 producer: competitors lacking the receptor cannot take those siderophores up; thus, no piracy  
51 can occur (16, 17). One such innovative way is the incorporation of polyamines into the nascent  
52 siderophore, which has evolved in multiple species that naturally produce polyamines. Thus,  
53 diaminopropane (DAP) is incorporated into serratiochelin in *Serratia plymuthica* (18),  
54 norspermidine is incorporated into vibriobactin in *Vibrio cholerae* (19) and vulnibactin in *Vibrio*  
55 *vulnificus* (20), putrescine is incorporated into photobactin in *Photobacterium luminescens* (21), and  
56 spermidine is incorporated into parabactin in *Paracoccus denitrificans* (22) and agrobactin in  
57 *Agrobacterium tumefaciens* (23).

58 Polyamines are small organic molecules with various numbers of carbons and amine  
59 moieties and a flexible structure (24, 25). They are synthesized by most bacteria and some  
60 eukaryotes (26) from L-lysine, L-methionine, L-aspartate, and L-arginine, with bacteria  
61 synthesizing a greater diversity of polyamines than eukaryotes. These moieties are incorporated  
62 into the nascent siderophore molecules by dedicated amide synthases, which contain stand-alone  
63 condensation domains structurally related to those found in non-ribosomal peptide synthetases

64 (27, 28). Amide synthases have already been identified in several organisms that produce  
65 polyamine-containing siderophores, such as PhbG in *Photorhabdus* spp. (21), SchH in *Serratia* spp.  
66 (18), and especially VibH in *Vibrio* spp. (28). VibH has been crystalized and the condensing activity  
67 thoroughly studied (28). The amide synthase involved in the assembly of agrobactin in  
68 *Agrobacterium* spp. has yet to be identified though its biosynthetic cluster is known (29). The  
69 biosynthetic cluster for parabactin, thus also its amide synthase, has yet to be identified.

70 *S. plymuthica* stands out for its ability to produce the nonribosomal peptide antibiotic  
71 zeamine and the nonribosomal peptide siderophore serratiochelin (30, 31). Gene clusters  
72 evolutionarily obtained by *S. plymuthica* from a diversity of bacteria, such as *Dickeya zeae* (30,  
73 31), *Escherichia coli*, and *Vibrio* spp. (18), are involved in the assembly of these molecules. In this  
74 work, we further explored and elucidated the diversity of siderophores produced by *S. plymuthica*  
75 and dissected the interplay of two catechol siderophore pathways with a superpathway for  
76 polyamine production, as well as their role in the diversification of catechol siderophores in this  
77 organism. In addition, to shed light on the relationship between the amide synthases and their  
78 preference for specific polyamines, we identified active site residues using bioinformatics tools.  
79 Furthermore, we dissected the diversity of putative TBDRs in the genome of *S. plymuthica*.

80 In this work, *S. plymuthica* was found to produce an extraordinary diversity of  
81 siderophores, which we termed the *siderome*. This diversity is generated by an interplay of three  
82 independent siderophore biosynthetic clusters and a prolific polyamine production  
83 superpathway, which is rare among Enterobacteriaceae. These siderophores were serratiochelin,  
84 enterobactin, photobactin, and aerobactin. To the best of our knowledge, this is the first  
85 published natural occurrence of serratiochelin, photobactin, enterobactin, and aerobactin in a  
86 single bacterial species. These findings suggest that the capacity of *S. plymuthica* to accrue  
87 biosynthetic clusters that evolved in other organisms is more extensive than so far described. Our  
88 results emphasize the utility of studying the evolution of natural product biosynthetic pathways  
89 and networks.

## 90 Results

### 91 Characterization of the siderophores produced by *S. plymuthica*

92 *S. plymuthica* produces serratiochelin (18), enterobactin (32, 33), photobactin (21), and  
93 aerobactin (34) (Figure 1). The presence and identity of the molecules was investigated using

94 liquid chromatography coupled tandem mass spectrometry analyzed by XCMS, Thermo XCalibur<sup>®</sup>,  
95 PubChem, and Chemdraw, and by comparing the fragmentation pattern of each of the predicted  
96 or known patterns (depicted in Supplemental Figures 1 through 4). When the gene clusters  
97 involved in the assembly of serratiochelins were originally characterized (here p1 and p2, Figure  
98 1b), it was found that the enzyme SchF0 encoded in gene cluster p1 and homologous to EntF in *E.*  
99 *coli*, was not involved in this process. Instead, the enzymes SchF1F2F3 encoded in gene cluster p2  
100 and homologous to VibF in *V. cholerae*, were involved (18). Given that enterobactin is also  
101 synthesized by *S. plymuthica*, we hypothesized that although SchF0 is not involved in  
102 serratiochelin assembly, SchF0 might nonetheless be essential for enterobactin assembly. We  
103 thus screened wildtype and SchF0 mutants of *S. plymuthica* for the production of enterobactin  
104 (Figure 2d). We found that we observed that the disruption of *schF0* affected only the assembly  
105 of enterobactin, whereas the disruption of *schF3* abolished the production of all other catecholate  
106 siderophores (Figure 2). Accordingly, *schF0* is not a pseudogene as previously suggested (18) but  
107 a gene utilized specifically for the assembly of enterobactin and not for other catecholate  
108 siderophores in this organism.

109 Next, we sought to characterize SchE encoded in gene cluster p2. This is a homologue of EntE,  
110 which adenylates the catechol precursor of enterobactin, 2,3-dihydroxybenzoate (DHB), and  
111 tethers it to holo-EntB (35). This is a crucial step in catecholate siderophore assembly (35). We  
112 screened an SchE mutant for the production of each of the aforementioned siderophores. As  
113 expected, solely aerobactin, which is a hydroxamate siderophore, was synthesized. This result  
114 agrees with our predictions and shows that no other EntE/SchE homologues are present in the  
115 genome of *S. plymuthica*. In an earlier study, it was found that the condensation of polyamines  
116 with DHB is catalyzed by SchH in *S. plymuthica* (encoded in cluster p2) (18). Therefore, we  
117 screened a SchH deletion mutant for the biosynthesis of serratiochelin and photobactin, which  
118 contain polyamine moieties (DAP and putrescine, respectively). We found that the SchH knockout  
119 strain did not synthesize these siderophores. Aerobactin was still produced, as was enterobactin.  
120 These siderophores do not have a polyamine moiety, and so the inability to synthesize the  
121 polyamine would not have affected the production of these siderophores. In fact, enterobactin  
122 was overproduced, in comparison with enterobactin production from the wild-type strain ( $p =$   
123 0.004).

124           Lastly, given that we detected aerobactin in our samples, we decided to query the  
125 genome of *S. plymuthica* for genes homologous to those involved in the biosynthesis of aerobactin  
126 in other organisms. This enabled us to locate a chromosomal operon homologous to *iucABCD*,  
127 which we termed *schIJKL* (p3), as not to be confused with *schABCD* (34) (Figure 3a). The four genes  
128 in this operon were highly similar to those in a *Yersinia* strain, with identities as high as 89%, as  
129 determined by pairwise analysis with the Basic Local Alignment Search Tool, BLAST2p  
130 (Supplemental Table 1). LucA (a homolog of SchI) catalyzes the intermediate step that converts L-  
131 lysine to aerobactin (34). To test whether this operon was indeed responsible for the production  
132 of the hydroxamate siderophore aerobactin, we built a SchI-defective mutant and tested it for the  
133 capacity to synthesize aerobactin. We found that the  $\Delta$ SchI strain did not produce aerobactin  
134 (Figure 3d and e), whereas the wild-type strain and all other mutants were capable of synthesizing  
135 aerobactin (Figure 2). This confirms that the *schIJKL* operon (p3) is indeed responsible for the  
136 biosynthesis of aerobactin.

137           After confirming the phenotypes caused by the knock-out of SchF0, SchE, SchH, or SchI,  
138 we quantified the relative abundances of each type of siderophore for each mutant (Figure 4) in  
139 order to establish the potential contribution of each siderophore to the siderome, as well as its  
140 potential contribution to iron chelation, in this organism. In the wild-type strain, serratiochelin  
141 represented over 80% of the siderophores and enterobactin, nearly 13%. There were small  
142 amounts of photobactin and aerobactin. In fact, the abundance of aerobactin was too low for  
143 quantification with the equipment used (Agilent single quadrupole mass spectrometer G6120a).  
144 Interestingly, knocking out SchI led to decreased production of serratiochelin ( $p=0.004$ ) and  
145 photobactin ( $p=0.019$ ). When the production of all polyamine siderophores was abolished  
146 ( $\Delta$ SchH), the relative levels of enterobactin increased by ca. 50% ( $p = 0.004$ ). The yields of all  
147 polyamine siderophores decreased when SchI was knocked out ( $p < 0.05$ ), except for enterobactin,  
148 whose levels did not change. This suggests that the role of aerobactin in iron chelation in this  
149 organism is secondary when other siderophores are available. Moreover, it suggests that  
150 enterobactin takes up the iron chelation needs arising from lack of aerobactin. This compensatory  
151 activity by enterobactin may result from enterobactin requiring fewer enzymes and polyamines  
152 for assembly, in comparison with the polyamine siderophores.

## 153 Growth kinetics of *S. plymuthica* defective in the production of siderophores

154       Given that *S. plymuthica* synthesizes a plethora of siderophores, we were interested in  
155 understanding how each of these siderophores influences bacterial growth in iron-limited  
156 conditions. Therefore, we created mutant strains defective in the production of specific types of  
157 siderophores. Then we compared the growth of the mutants versus wild type, in the presence or  
158 absence of bipyridyl, a soluble iron chelator. Bipyridyl chelates any soluble iron that might still be  
159 present in the minimal medium and thus leads to the activation of the siderophore-producing  
160 machinery due to low soluble iron stress. We followed the growth of the strains over time and  
161 measured their maximum growth rate and maximum OD reached (Figure 5), in order to  
162 understand the relative importance of each group of siderophores (polyamine, catecholate, and  
163 hydroxamate siderophores). Overall, we found that the growth rate in minimal medium with  
164 bipyridyl was lower than in its absence for all strains except for the *schF0* mutant (Table 1). In the  
165 case of *schF0*, the maximum growth rate was, in fact, 39% ( $p=4.38 \times 10^{-7}$ ) higher in the presence  
166 of bipyridyl than in its absence, but the maximum OD<sub>610nm</sub> reached was 18% lower in the presence  
167 of bipyridyl than in its absence. We found that not producing catecholate or polyamine  
168 siderophores (SchE or SchH knockouts) increased the maximum growth rate of those mutants  
169 even in the presence of bipyridyl (Table 1). More precisely, there was an increase in growth rate  
170 of 30% for the SchH mutant and ca. 18% for the SchE mutant ( $p_{\text{SchH}}=1.33 \times 10^{-35}$ ,  $p_{\text{SchE}}=4.43 \times 10^{-33}$ ).  
171 Interestingly, when the organism was only incapable of producing enterobactin (SchF0  
172 knockout), its maximum growth rate was reduced to 56% (without bipyridyl,  $p=3.90 \times 10^{-21}$ ) and  
173 89% (with bipyridyl,  $p=0.004$ ) compared to wild-type. The maximum OD<sub>610nm</sub> this mutant reached  
174 was also the lowest of all mutants and wild-type, even when grown in the absence of bipyridyl.  
175 To check whether these growth defects could be due to unexpected polar effects caused by the  
176 introduction of a suicide vector into *schF0*, we built a complementation strain, as well as related  
177 controls (Table 1). This complementation strain corresponds to the enterobactin-deficient strain  
178 ( $\Delta\text{SchF0}$ ) carrying a plasmid from which SchF0 is expressed. The complementation led the mutant  
179 strain to achieve both growth rates and ODs higher than the control (wild type carrying an empty  
180 pTrc99A plasmid) in the presence and absence of bipyridyl ( $p_{\text{GR}} = 3.51 \times 10^{-7}$ ,  $p_{\text{OD}} = 3.96 \times 10^{-4}$ , and  
181  $p_{\text{GR}} = 6.29 \times 10^{-14}$  and  $p_{\text{OD}} = 1.96 \times 10^{-12}$ , respectively). The higher growth rates and ODs could be  
182 due to the plasmid being present in multicopy (pBR322 ori); if this was the case, SchF0 would have  
183 been more abundant in the complementation mutant than in the wildtype. These observations

184 indicate that the slower growth of the SchF0 knockout strain can be attributed to its inability to  
185 produce enterobactin.

186 Our results suggest that although *S. plymuthica* produces more serratiochelin than any  
187 other siderophore, enterobactin and aerobactin seem to be the most cost-efficient siderophores,  
188 as revealed by the maximum OD<sub>610nm</sub> and growth rate values for the SchE-, SchF0-, and SchI-  
189 deficient mutants (Table 1). In fact, enterobactin seems to play the most preponderant role in  
190 stimulating bacterial growth, as the lowest growth rates and OD<sub>610nm</sub> were observed in the  
191 enterobactin-deficient strain.

### 192 Characterization of the polyamine production superpathway

193 The biosynthesis of the *Serratia* spp.-proprietary siderophore serratiochelin is  
194 interconnected with that of polyamines. More precisely, the biosynthetic amide synthase SchH  
195 utilizes DAP as substrate for the assembly of serratiochelin (18). We also found that this same  
196 enzyme catalyzes the condensation of putrescine (rather than DAP) with DHB, to assemble  
197 photobactin (21) (Figure1). The natural biosynthesis of DAP is not a generalized feature of the  
198 Enterobacteriaceae, although its heterologous expression has been achieved in *E. coli* (25, 36).  
199 DAP is utilized in industry for the production of certain plastics (37–39) and as the basis for the  
200 production of agrochemicals (40). Homology searches for enzymes involved in the production of  
201 polyamines in *S. plymuthica* (41) enabled us to establish a putative amine production  
202 superpathway (Figure 6, Supplemental Table 2). We found that this organism encoded the  
203 machinery required for the synthesis of DAP, putrescine, cadaverine, and spermidine. Spermidine  
204 could potentially be synthesized from putrescine via S-adenosylmethionine decarboxylase, which  
205 has been found to transfer the aminopropyl group from S-adenosyl-3-(methylthio)propylamine to  
206 putrescine, originating spermidine in some prokaryotes (42–44) and eukaryotes (26, 45, 46). In  
207 some cases, spermidine can be converted to spermine by a second step that involves the transfer  
208 of an additional aminopropyl group to spermidine (47). Given that DAP and putrescine, although  
209 not present in the growth medium, are incorporated into serratiochelin and photobactin  
210 produced by *S. plymuthica*, it can be assumed that these polyamines are synthesized  
211 endogenously.

212 To determine which other polyamines were produced as well, samples obtained by the  
213 lysis of cell pellets were derivatized by dansylation and analyzed by tandem mass spectrometry



214 for the presence of DAP, cadaverine, putrescine, spermidine, spermine, N-hydroxycadaverine,  
215 and aminopropylcadaverine. Furthermore, the abundance of DAP, cadaverine, putrescine, and  
216 spermidine was assessed by UV absorbance at  $\lambda=340\text{nm}$  in liquid chromatography based on  
217 polyamine standards purchased from Sigma - Aldrich (Supplemental Figures 5- 8). *S. plymuthica*  
218 was found to produce  $97.75\pm 0.01 \mu\text{mol/g DW}$  of DAP and  $30.83\pm 0.003 \mu\text{mol/g DW}$  of putrescine,  
219 and small amounts of cadaverine ( $6.58\pm 0.01 \mu\text{mol/g DW}$ ) and spermidine ( $2.32\pm 0.004 \mu\text{mol/g}$   
220 DW). This level of DAP is ca. 60-fold higher than the highest reported yields of DAP naturally  
221 produced by other Proteobacteria (48).

222 Furthermore, part of the proposed polyamine production superpathway was confirmed  
223 by generating knockout strains and assessing their capacity to produce the predicted polyamines.  
224 The Sch\_20905 knockout strain did not synthesize cadaverine (Supplemental Figure 9). We were  
225 unable to generate the other polyamine mutants, despite using the same approach as that used  
226 to generate all the other mutants, i.e., suicide vectors (see Methods). This suggests that DAP,  
227 putrescine, and spermidine may play essential roles in this organism. Spermidine, for example, is  
228 essential to the agrobactin-producing species *Agrobacterium tumefaciens* (49).

### 229 Diversity of TonB-dependent receptors in *S. plymuthica*

230 Having elucidated the siderome of *S. plymuthica*, we were interested in understanding  
231 whether there was a corresponding TonB-dependent receptor (TBDR) for each type of  
232 siderophore produced. TBDRs are outer membrane proteins that, together with their inner  
233 membrane counterparts TonB, ExbB, and ExbD, transport selected siderophore-iron complexes,  
234 vitamin B12, nickel complexes, and carbohydrates into the cell (8). To assess the diversity of  
235 TBDRs, we queried the genome of *S. plymuthica* for known genes. As expected, we found the  
236 genes encoding the putative TBDRs specific for the siderophores produced, as well as others, for  
237 a total of 12 TBDRs. Specifically, we identified one putative receptor homologous to VuuA  
238 (vulnibactin) (50), ViuA (vibriobactin) (50), and PhuA (photobactin) (21), suggesting that a single  
239 receptor is capable of transporting all polyamine siderophores produced by *S. plymuthica*.  
240 Additionally, *S. plymuthica* encodes a FepA homolog that transports enterobactin (and colicins)  
241 (51), a LutA homolog that transports aerobactin (52), two CirA homologs that transport  
242 catecholate and colicin (53, 54), a YiuR homolog (55), and the homologous IrgA, which is a  
243 virulence factor without known transport functions (56). *S. plymuthica* was also found to encode

244 receptors for fungal siderophores: a FhuE/PupB homolog that transports coprogen and  
245 rhodotorulic acid (57, 58), and a FhuA homolog that transports ferrichrome (59). In addition, it  
246 encodes receptors for mammalian hemoglobin, transferrin and lactoferrin (hemlactrns receptor  
247 family); hemin (HemR/HmuR/HxuC receptors) (60–62); and vitamin B12 and cobalamin (BtuB  
248 receptor) (63); as well as a homolog of the receptor BfrD/Fiu, which recognizes alcaligin,  
249 enterobactin, ferrichrome, and desferrioxamine B (64) (Figure 1, Supplemental Table 3). No  
250 serratiochelin-dedicated TBDR was found; thus, serratiochelin may be transported into the cell by  
251 the same TBDR as all other polyamine-containing siderophores (termed VuuA, ViuA, and PhuA,  
252 depending on the organism), as these siderophores are structurally related. Our analyses  
253 confirmed that, similar to other species, the genome of *S. plymuthica* encodes TBDRs that are  
254 more diverse than the siderophores this species synthesizes. This disparity is potentially  
255 associated with siderophore piracy, by which this species obtains iron via siderophores the  
256 organism did not spend energy making (15).

#### 257 Distribution of amide synthases across bacterial orders

258 Having established that *S. plymuthica* produces a diversity of polyamine-containing  
259 siderophores, we were interested in determining how widespread the distribution of the amide  
260 synthases is, as this could correlate with the discovery of new polyamine-containing siderophores.  
261 Amide synthases are enzymes crucial for the assembly of siderophores that contain polyamines  
262 (18, 28). These enzymes condense amines with other molecules, forming a carbon-nitrogen bond.  
263 To the best of our knowledge, the first amide synthase described as being involved in  
264 nonribosomal peptide assembly was VibH (28). VibH condenses norspermidine with DHB and is  
265 involved in the assembly of vibriobactin (28). SchH, a VibH homolog, is involved in the assembly  
266 of serratiochelin via DAP (18). PhbG, an uncharacterized homolog of VibH and SchH, is likely the  
267 amide synthase involved in the assembly of photobactin via putrescine in *Photorhabdus*  
268 *asymbiotica*, though this has yet to be experimentally confirmed. We then asked how widespread  
269 the distribution of amide synthases is and whether siderophores containing polyamines have  
270 already been characterized for those same organisms.

271 A tree containing 250 SchH homologs was generated using the Distance Tree of Results  
272 tool in BLASTp (Figure 7). Branches containing strains from the same species were collapsed for  
273 an easier interpretation of results. We then performed bibliographic searches aiming to find

274 whether polyamine-containing siderophores had been characterized in these organisms. Of the  
275 organisms included in the tree, some have been described as producing nigribactin (*Vibrio*  
276 *nigripulchritudo*) (65), fluvibactin (*Vibrio fluvialis*) (66), vibriobactin (*V. cholerae*) (19), photobactin  
277 [*Photorhabdus* spp. (21) and *S. plymuthica* V4 (this study)], serratiochelin (*Serratia* spp.) (18, 67),  
278 parabactin (*Paracoccus* spp.) (68), and agrobactin (*Agrobacterium* spp.) (23). We anticipate that  
279 many more potentially new polyamine catechol siderophores have yet to be characterized for the  
280 remaining organisms, as they encode amide synthases as well as the remaining biosynthetic  
281 machinery for the assembly of catecholate siderophores. In the particular case of *Brucella* spp.,  
282 brucebactin (69), its catechol siderophore, is unstable; this instability has prevented the  
283 elucidation of its structure.

284         The analysis of the phylogenetic tree for SchH and its homologs did not reveal a particular  
285 evolutionary separation of the different molecules or of the aspects that make them different,  
286 such as the polyamine incorporation and condensation of DHBs on one or both primary amines  
287 (Figure 7; Supplemental Table 4). Amide synthases, key elements in the diversification of  
288 polyamine-containing siderophores, are encoded in diverse bacteria (Figure 7). Looking more  
289 closely at the standalone condensation domain of these amide synthases, we sought to correlate  
290 the active site residues (28), as well as the putative donor (polyamine) and acceptor binding  
291 (carrier protein-bound DHB) residues (70), with the polyamines they condensed. For all  
292 sequences, independently of the organism and polyamine-siderophore assembled, we found that  
293 the third residue in the active site motif HHIXXDG was conserved, whereas it usually is not  
294 conserved in condensation domains (HHXXXDG, Supplemental Table 4). For the donor  
295 (polyamine)-binding site, no clear sequence correlation was found. However, on the acceptor site,  
296 where DHB is presented by a carrier protein in all of the pathways, we found that the residue  
297 predicted to be crucial for substrate recognition (70) is invariably occupied by a valine (SchH  
298 residue 301). Furthermore, we identified a surface-exposed motif that appears to be  
299 characteristic of amide synthases and cannot be found in the condensation domains of other  
300 Nonribosomal Peptide Synthetases (71). As this motif is adjacent to W264 in VibH, a residue  
301 suggested to be important for protein-protein interaction (27), we propose that the entire motif  
302 supports the interaction with the carrier protein presenting DHB for condensation with the  
303 polyamine. To illustrate our findings, we generated a homology model for SchH based on the VibH

304 crystal structure and mapped the described residues and motifs onto this model (Supplemental  
305 Figure 10).

306 Overall, our findings suggest that, similarly to what we observed with SchH, a single amide  
307 synthase might be capable of condensing a diversity of polyamines with the seemingly universal  
308 DHB acceptor. Nonetheless, this reaction might not be equally efficient for all polyamines, as we  
309 observed for putrescine and DAP, with the former being minimally used for siderophore assembly.

## 310 Discussion

311 The capacity of pathogenic bacteria to acquire iron is intrinsically associated with their capacity  
312 to cause disease in humans (72). Siderophores, small molecules that act as iron scavengers and  
313 transporters, have thus been repeatedly categorized as virulence factors in some of the deadliest  
314 pathogenic bacteria that humans have encountered. Both *Yersinia pestis* and *Klebsiella*  
315 *pneumoniae*, for example, require the siderophore yersiniabactin for colonization of a mammalian  
316 host (73). It has been found that this same siderophore protects uropathogenic *E. coli* from copper  
317 toxicity during infection, while enterobactin allows the pathogen to survive (74). In fact,  
318 vertebrates do not have free, soluble iron ( $\text{Fe}^{2+}$ ) that bacteria can use for growth. This mechanism,  
319 termed nutritional immunity, is considered a vertebrate barrier to pathogen infection (75). Likely  
320 as a result of the pathogen-host struggle for iron, pathogens are thought to have evolved  
321 numerous ways of surviving in the host by resorting to siderophores to obtain iron. One of these  
322 strategies consists of expressing not one but a diversity of siderophores, as in the case of *S.*  
323 *plymuthica*. Although it rarely infects humans (76–78), *S. plymuthica* has collected several ways  
324 of synthesizing a diversity of siderophores and of acquiring xenosiderophores as well.

325 In this study, we found that *S. plymuthica* diversifies its siderophore production via a  
326 natural enzymatic mixing-and-matching. Initially this organism was characterized, like other  
327 *Serratia* species, as producing the siderophore serratiochelin (18, 67). In this study, we detected  
328 the biosynthesis of two additional catecholate non-ribosomal siderophores — enterobactin and  
329 photobactin — as well as aerobactin, a hydroxamate siderophore. The presence of these  
330 additional siderophores further supports the concept of the inheritance of genes as collectives  
331 (79); in other words, the concept that certain sets of genes evolve together and more quickly than  
332 their individual genes. The siderophores in *S. plymuthica* also exemplify how the enzymes  
333 encoded in these gene collectives can be diverted towards the assembly of not one but multiple

334 molecules. Interestingly, this large diversity of siderophores in a single organism is more  
335 commonly associated with pathogenic bacteria than with environmental species such as *S.*  
336 *plymuthica*, which is rarely a cause of human disease (76). Apparently, the production of multiple  
337 siderophores is worth the metabolic cost for the bacteria that produce them, given the benefit of  
338 survival (80).

339 In fact, one of the most striking features of this organism is how efficiently it juggles two  
340 biosynthetic gene clusters to diversify the production of its catecholate siderophores. It was  
341 previously shown that the condensation domain-containing SchF0 is not involved in the assembly  
342 of serratiochelin (18). Indeed, SchF0 is not involved in the assembly of polyamine-containing  
343 siderophores, whereas it is crucial for the assembly of enterobactin in this organism. In *S.*  
344 *plymuthica*, instead of SchF0, three enzymes (SchF1F2F3) assemble serratiochelin and  
345 photobactin, while the enterobactin pathway provides DHB for these siderophores. These  
346 enzymes condense the thiol-bound DHB of the aryl carrier protein SchB with the thiol-bound  
347 threonyl of SchF3, instead of the seryl of SchF0, which is used for enterobactin. Thus, the diversity  
348 of the secondary metabolome may be underestimated, in particular if prediction tools are used,  
349 and too much reliance is placed on gene clustering for functional interpretation (81).

350 Another level of molecular diversification occurs when SchH condenses either DAP or  
351 putrescine with the acylated dihydroxybenzoyl of SchB, and SchF3 finalizes the assembly of  
352 serratiochelin (DAP) or photobactin (putrescine). *S. plymuthica* synthesizes serratiochelin and  
353 photobactin, which implies that it can synthesize the diamines DAP and putrescine. Queries to the  
354 genome of *S. plymuthica* for all the known genes that encode the enzymes involved in the  
355 polyamine superpathways of other organisms showed that the genetic makeup required was  
356 indeed present (Supplemental Table 2). The genetic basis of the superpathways was further  
357 confirmed by analyzing the polyamines actually produced by *S. plymuthica*, as assessed by LC-  
358 MS/MS detection and quantification of intracellular derivatized polyamine preparations (Figure  
359 6).

360 The intercommunication of enzymes encoded by genes in two independent clusters,  
361 coupled with the substrate flexibility of SchH and the polyamine production profile of this  
362 organism, allows for two pathways to generate three distinct siderophores. To the best of our  
363 knowledge, the present study is the first to report that such interplay contributes to the

364 diversification of nonribosomal peptides in a non-engineered organism. Furthermore, aerobactin,  
365 an additional, ribosomal siderophore, is also assembled independently of the others.  
366 Nonetheless, our results indicate that the production of polyamine siderophores might be  
367 particularly costly, as knocking out their production resulted in faster-growing cells, with cultures  
368 reaching higher ODs, as well (Table 1). Despite the abundance of siderophores produced,  
369 enterobactin still seems to play a major role in this organism: under iron-limiting conditions its  
370 absence leads to much slower growing cells that reach lower ODs. This suggests that the  
371 widespread presence of enterobactin among Proteobacteria might be due to its particularly high  
372 binding affinity for iron ( $K_d=10^{-52}$  M)(82) and its cost efficiency.

373         The production of DAP in this organism, which is incorporated into its most abundant  
374 siderophore, was found to have the highest yield so far documented for a wild-type strain, to the  
375 best of our knowledge (25, 48, 83). This high yield suggests that bacteria that naturally produce  
376 polyamines and incorporate them into other molecules could potentially be optimized for the  
377 industrial-level production of polyamines. Polyamines are believed to be ancient molecules; not  
378 only are they present in all domains of life but there are multiple, convergent pathways resulting  
379 in a given polyamine (84, 85). However, it remains elusive how siderophores evolved and what  
380 selective forces gave rise to the intertwining of their biosynthetic pathways with polyamine  
381 biosynthesis. One hypothesis is that the competition for siderophores and the importance of  
382 preventing “cheaters” from utilizing xenosiderophores may be a driving force in siderophore  
383 evolution (11–13).

## 384 **Materials and Methods**

### 385 **Strains, plasmids, and growth media**

386         The strains and plasmids used and built for this study are listed in Table 2. Minimal  
387 medium optimized for the production of serratiochelins (18) was used for siderophore  
388 production. The minimal medium used consisted of Na<sub>2</sub>HPO<sub>4</sub> (5.96 g/L), K<sub>2</sub>HPO<sub>4</sub> (3.0 g/L), NH<sub>4</sub>Cl  
389 (1.0 g/L), NaCl (0.5 g/L), MgSO<sub>4</sub> (0.058 g/L) and C<sub>6</sub>H<sub>12</sub>O<sub>6</sub> (5.0 g/L). The final pH of the medium  
390 was 7.0.

### 391 **Siderome extraction and analysis**

392         First, we grew *S. plymuthica* in the minimal medium described above. Overnight glucose-  
393 depleted cultures of *S. plymuthica* were used to inoculate 300 mL of minimal medium containing

394 0.1% bipyridyl. Bacteria were grown at 250 rpm with shaking at 30°C, until glucose depletion  
395 (monitored using QuantoFix® Glucose, Macherey-Nagel, USA). After the incubation period the  
396 cells were spun down and the supernatant was filter-sterilized (PES, 0.22 µm) and acidified with  
397 0.1% trifluoroacetic acid (TFA, final concentration). The acidified supernatant was run through Sep-  
398 Pak tC18 (200 mg) Reversed-Phase columns (Waters®), the columns were washed with 0.1% TFA  
399 in water, and the molecules were eluted with 95% acetonitrile acidified with 0.1% TFA as well.  
400 The extracted molecules, with varying hydrophobic character, were subsequently called  
401 "secondary metabolome," in this article.

402 Liquid chromatography followed by tandem mass-spectrometry (LC-MS/MS) for  
403 secondary metabolome analysis was performed at the Small Molecule Mass Spectrometry core  
404 facilities at Harvard University. In order to detect and identify metabolites present in the samples,  
405 we performed XCMS Online analyses (86). The fragmentation patterns observed for the  
406 siderophores were compared with the described or predicted ones, utilizing ChemDraw.

#### 407 Generation of siderophore knockout mutants and determination of siderophore 408 relative abundance

409 Based on prior knowledge of serratiochelin production, we asked whether these same  
410 gene clusters were responsible for the bioassembly of enterobactin and photobactin, detected in  
411 the siderome of *S. plymuthica* (18). We screened SchE (sch\_19080), SchF0 (AHY08574.1), SchF3  
412 (AHY05892.1), and SchH (AHY05888.1) knockout mutants for the production of each of these  
413 molecules. The mutants were kindly provided by Professor Roberto Kolter (Harvard Medical  
414 School).

415 The analysis of the metabolome also revealed the presence of aerobactin, a hydroxamate  
416 siderophore (34). In order to identify the operon responsible for the biosynthesis of aerobactin in  
417 *S. plymuthica*, we performed *iucA* homology searches in this organism using BLASTp (87, 88). *iucA*  
418 is one of the four biosynthetic genes in the aerobactin operon, previously characterized (34). This  
419 gene codes for a key enzyme in aerobactin biosynthesis, converting *N*<sup>6</sup>-acetyl-*N*<sup>6</sup>-hydroxy-L-lysine  
420 to *N*<sup>1</sup>-citryl-*N*<sup>6</sup>-acetyl-*N*<sup>6</sup>-hydroxy-L-lysine (34).

421 In order to search for *iucA* in *S. plymuthica*, we generated a knockout mutant of *S.*  
422 *plymuthica* in which the gene *schI*, homologous to *iucA*, was disrupted by a suicide vector. This  
423 suicide vector was an R6K plasmid (which replicates only in the presence of the Pir protein)

424 carrying a 350 bp region of homology towards the 5' end of the gene. *schI* was disrupted to disable  
425 the biosynthesis of aerobactin by *S. plymuthica*. The suicide plasmid was cloned and maintained  
426 in *E. coli* S17- $\lambda$ Pir-1, and the plasmid was moved to *S. plymuthica* by electroporation. The R6K  
427 origin does not replicate in *S. plymuthica* but integrates at a low rate into the chromosome at the  
428 designated locus of shared homology between the plasmid and the chromosome. The  
429 transformants were plated on selective medium, and the resulting colonies were PCR-verified for  
430 the integration of the suicide vector into *schI*.

431 A SchF0 knockout complementation mutant was also built, in order to confirm that the  
432 growth defects observed for the  $\Delta$ SchF0 mutant resulted from the absence of SchF0 and not from  
433 polar effects. To create the complementation mutant, *schF0* was PCR-amplified from *S.*  
434 *plymuthica* V4 and cloned into plasmid pTRC99 by restriction digest and ligation. The construct  
435 was then electroporated into *S. plymuthica* V4 *schF0::GntR*. The empty vector pTRC99 was also  
436 electroporated into wild-type *S. plymuthica* V4, for use as control.

437 In order to characterize the sideromes of the wild-type strain and each of the mutants,  
438 we grew each strain in 300 mL of minimal medium supplemented with 0.1% bipyridyl, as described  
439 above. The cultures were monitored for glucose depletion and sampled at this point. Acidified  
440 (0.1% TFA) cell-free spent medium (270 mL) was supplemented with an internal control (0.5 mM  
441 Tyr-Tyr-Tyr eluent concentration, Sigma-Aldrich T2007). The spent medium was subsequently  
442 loaded into a Sep-Pak tC18 column (100 mg), as already described, and the compounds attached  
443 to the column were washed with 10% ACN (0.1% TFA) and eluted with 60%. Samples were then  
444 analyzed by High Performance Liquid Chromatography (HPLC) mass spectrometry (instrument:  
445 Agilent 1100, column: Agilent Zorbax Eclipse XDB-C18 80Å, 4.6 x 150 mm, 5 $\mu$ m; detector: Agilent  
446 single quadrupole mass spectrometer G6120a, injection volume 10  $\mu$ L, gradient: 10% (v/v) ACN in  
447 water with 0.1% TFA for 1 minute, gradient to 55% ACN with 0.1% TFA over 25 minutes).

#### 448 Growth dynamics of the wild-type strain and siderophore mutants

449 Given the diversity of siderophores produced by *S. plymuthica*, we were interested in  
450 understanding the role they played in the survival of this strain in low iron conditions. We followed  
451 their growth kinetics, utilizing a microtiter plate reader programmed to take OD<sub>610nm</sub>  
452 measurements every 20 minutes over 42 hours. Overnight (glucose depleted) cultures of the  
453 mutant and wild-type strains grown in minimal medium were used as inocula (OD<sub>610nm</sub> 0.05).



454 Cultures of each strain (200 mL) were then incubated in 96-well plates, in the presence or absence  
455 of bipyridyl (6 wells per condition and strain, experiment repeated on 3 independent occasions).  
456 The data for each strain was averaged and plotted as OD<sub>610nm</sub> as a function of time (hours). This  
457 data also enable the determination of the bacterial growth rate. The standard deviation for each  
458 group of data was calculated and is represented by error bars in the plots. The programming  
459 language R was used to calculate the maximum growth rate, the time at which maximum growth  
460 occurred (package *growthrates*), and the maximum OD<sub>610nm</sub>.

461 A separate experiment was performed to compare the growth kinetics of the *schFO*  
462 complementation strain *schFO::GntR pTRC99\_schFO* and wild-type pTrc99.

### 463 Elucidation of the polyamine biosynthesis superpathway in *S. plymuthica* and 464 polyamine production

465 *S. plymuthica* synthesizes serratiochelins by incorporating DAP into the nascent molecule.  
466 We thus asked what other polyamines this organism produces and whether they are utilized to  
467 generate analogs of serratiochelin.

468 We started by analyzing the superpathways for polyamine production in bacteria using  
469 MetaCyc (41). Using BLASTp (87), we queried *S. plymuthica* V4 for each of the enzymes in all three  
470 superpathways of polyamine biosynthesis. The similarity levels between the two homologous  
471 proteins were calculated using BLAST2p.

472 Aiming to confirm that the genes found indeed encoded enzymes involved in polyamine  
473 production, we tried to generate 8 knockout mutants using suicide vectors, as described for Schl.  
474 The genes we sought to disrupt were *sch\_13190*, *sch\_13195*, *sch\_20905*, *sch\_21940*, *sch\_21945*,  
475 *sch\_22085*, *sch\_22090*, and *sch\_22290*. Disruption of the genes *sch\_21950*, *sch\_23995*, and  
476 *sch\_24800* was not attempted, as these genes have been deemed essential in *E. coli* (89). After  
477 multiple attempts and even after redesigning the suicide vector to increase regions of homology  
478 of >700 bp (in our hands, 400 bp suffice for single recombination in this strain), we were only able  
479 to disrupt *sch\_20905*; therefore, we proceeded with this mutant alone.

480 To analyze cellular content for the polyamines predicted to be synthesized in the wildtype  
481 and mutant strains, cells were grown as described above, and upon glucose depletion 10 OD<sub>610nm</sub>  
482 were pelleted. The pellets were resuspended in 500  $\mu$ L of sterile water and 500  $\mu$ L of 1.2 M

483 perchloric acid (containing 1 mM butylamine as internal standard), vigorously vortexed in order  
484 to lyse the cells, and incubated for 1 hour at 37°C. The lysate was centrifuged for 20 minutes at  
485 4°C and 12000 g, and the supernatant was collected (90).

486 Dansylation of polyamines was performed as described by Smith and Davies (91) with  
487 minor modifications, as follows: to 100 µL of the supernatant above, 200 µL of saturated NaCO<sub>3</sub>  
488 (130 g/L) and 400 µL of dansyl-Cl (7.5 mg/mL acetone) were added. After incubation in the dark  
489 for 1 hour at 60°C, 100 µL of proline (100 mg/mL) were added and the mixture was incubated for  
490 30 minutes at 37°C. Subsequently, the dansylated polyamines were extracted with 500 µL of  
491 toluene. For improved phase separation, the samples were centrifuged for 3 minutes at 3000 g.  
492 The organic phase was dried under a nitrogen stream and the pellet was resuspended in 50 µL of  
493 methanol. For identification of the polyamines produced, a 10 µL aliquot was injected into a high-  
494 resolution, accurate mass Q Exactive Plus Orbitrap, with positive ionization and mass scan ranging  
495 from 66 to 990 m/z (resolution 17.500 FWHM), and separated over the course of 30 minutes at a  
496 flow rate of 0.8 mL/min, with a gradient of 10% ACN in H<sub>2</sub>O to 100% ACN.

497 Authentic standards 1,3 - diaminopropane, putrescine, spermidine, spermine, and  
498 cadaverine were acquired from Sigma - Aldrich and used for determination of their fragmentation  
499 pattern, for comparison with the test samples. The standards were dansylated at the same time  
500 as the samples. The samples were analyzed as described elsewhere (91), at the Small Molecule  
501 Mass Spectrometry core facilities at Harvard University.

502 For quantification of the polyamines in *S. plymuthica*, samples were prepared as  
503 mentioned above except that they were resuspended in 100 µL of MeOH and analyzed by HPLC  
504 (instrument: Agilent 1100, column: Agilent Zorbax Eclipse XDB-C18 80Å, 4.6 x 150 mm, 5µm;  
505 detector: Agilent diode array detector G1315B, λ=340nm, injection volume 25 µL, gradient: 60%  
506 (v/v) MeOH in water for 1 minute, gradient to 100% MeOH over 23 minutes). Integrated peak  
507 areas were normalized based on the internal standard and converted to concentrations in mM,  
508 based on three samples of known concentration of each authentic standard.

509 The dry weight was determined as the pellet biomass after 24 hours at 85°C (92), and  
510 used to calculate the concentration in mole per gram of dry weight.

## 511 Comparative analysis of amide synthase

512 In order to determine the conservation and distribution of amide synthases, we queried  
513 the NCBI database for 250 homologs of SchH. In order to analyze how these homologs clustered  
514 together, based on protein sequence similarity, we downloaded the respective Newick trees  
515 (Neighbor Joining, 0.85 maximum sequence difference, Grishin distance).

516 The condensation domain of VibH has been thoroughly characterized by others, who  
517 revealed that its active site contains the highly conserved motif HHXXXDG (27, 93, 94). We asked  
518 whether the three variable residues correlated with the polyamine condensed into the nascent  
519 molecule. For this we queried the NCBI sequence database for homologs of the amide synthase  
520 SchH, from genera known to include strains that synthesize polyamine-containing siderophores.  
521 These were *S. plymuthica* (serratiochelin and photobactin), *Serratia marcescens* (serratiochelin),  
522 *Paracoccus* spp. (parabactin), *Agrobacterium/Rhizobacterium* (agrobactin), *Vibrio cholerae*  
523 (vibriobactin), *Vibrio fluvialis* (fluvibactin), *Vibrio nigripulchritudo* (nigribactin) and *Vibrio*  
524 *vulnificus* (vulnibactin). The available sequences (up to 250 per genus or strain) were aligned in  
525 NCBI (gap penalties -11, -1; end-gap penalties -5, -1; maximum cluster distance 0.8). The  
526 alignments were downloaded, further processed in CLC Sequence Viewer 7, and queried for the  
527 active site sequence. The residue variation in the conserved motif per bacterial species known to  
528 produce polyamine-containing siderophores was analyzed.

## 529 Identification of TonB-dependent siderophore receptors in *S. plymuthica* V4

530 Having established that *S. plymuthica* V4 produced a large repertoire of siderophores, we  
531 then asked whether this organism has a corresponding diversity of TonB-dependent siderophore  
532 receptors. In order to determine the diversity of TBDRs encoded in the chromosome of *S.*  
533 *plymuthica* V4, we queried it for each of the TBDR families thus far characterized (Uniprot  
534 reviewed entries only). The TBDRs found were compared to their respective protein reference  
535 sequences using NCBI's BLAST2p tool. This tool aligns two proteins and computes their level of  
536 similarity (88).

## 537 Homology modeling

538 To generate a homology model for the amide synthase SchH, we used the SWISS-MODEL  
539 server (95–97) with the VibH crystal structure as input (PDB: 1I5a, chain A; quality assessment:  
540 QMEAN -3.2). The model was visualized using PyMol (98).

## 541 Statistical treatment of data

542 Statistical significance of the results was analyzed using the unpaired, unequal variance  
543 non-parametric t-Test. Siderophore and polyamines relative and absolute levels, respectively,  
544 were determined from 3 independent experiments, with technical duplicates. The growth curves  
545 were calculated with the data obtained from 3 independent experiments, with 6 technical  
546 replicates. The statistical significance is represented in the figures by \* ( $p < 0.050$ ), \*\* ( $p < 0.010$ ) or  
547 \*\*\* ( $p < 0.001$ ).

## 548 Acknowledgments

549 This research was supported by the NIH Director's New Innovator Award 1-DP2-OD008435-01 to  
550 T.K.L., Novartis Award 68148476 to T.K.L., the United States Defense Threat Reduction Agency  
551 (HDTRA1-14-1-0007 and HDTRA1-15-1-0050) to T.K.L., and the Office of Naval Research (ONR  
552 4500000552) to T.K.L. K.H, is grateful for the support by the Human Frontier Science Program  
553 (Grant Number LT000969/2016-L).

## 554 Competing interests

555 T.K.L. is a co-founder of Senti Biosciences, Synlogic, Engine Biosciences, Tango Therapeutics,  
556 Corvium, BiomX, and Eligo Biosciences. T.K.L. also holds financial interests in nest.bio, Ampliphi,  
557 IndieBio, MedicusTek, Quark Biosciences, and Personal Genomics.  
558

## 559 References

- 560 1. Taylor SR (1964) Abundance of chemical elements in the continental crust: a new table.  
561 *Geochim Cosmochim Acta* 28(8):1273–1285.
- 562 2. Andrews SC (1998) Iron storage in bacteria. *Adv Microb Physiol* 40:281–351.
- 563 3. Andrews SC, Robinson AK, Rodríguez-Quiñones F (2003) Bacterial iron homeostasis. *FEMS*  
564 *Microbiol Rev* 27(2–3):215–237.
- 565 4. Ratledge C, Dover LG (2000) Iron metabolism in pathogenic bacteria. *Annu Rev Microbiol*  
566 54(1):881–941.
- 567 5. Chu BC, et al. (2010) Siderophore uptake in bacteria and the battle for iron with the host;  
568 a bird's eye view. *Biometals* 23(4):601–11.

- 569 6. Zheng, Tengfei EMN (2012) Siderophore-based detection of Fe ( iii ) and microbial  
570 pathogens. *Metallomics* 4:866–880.
- 571 7. Dunn LL, Rahmanto YS, Richardson DR (2007) Iron uptake and metabolism in the new  
572 millennium. *Trends Cell Biol* 17(2):93–100.
- 573 8. Noinaj N, Guillier M, Barnard TJ, Buchanan SK (2010) TonB-dependent transporters:  
574 regulation, structure, and function. *Annu Rev Microbiol* 64:43.
- 575 9. Poole K, McKay GA (2016) Iron acquisition and its control in *Pseudomonas aeruginosa* :  
576 Many roads lead to Rome. *Front Biosci* 8:661–668.
- 577 10. Jurkevitch E, Hadar Y, Chen Y (1992) Differential Siderophore Utilization and Iron Uptake  
578 by Soil and Rhizosphere Bacteria. *Appl Environ Microbiol* 58(1):119–124.
- 579 11. Cordero OX, Ventouras L -a., DeLong EF, Polz MF (2012) Public good dynamics drive  
580 evolution of iron acquisition strategies in natural bacterioplankton populations. *Proc Natl*  
581 *Acad Sci* 109(49):20059–20064.
- 582 12. Lee W, van Baalen M, Jansen VAA (2016) Siderophore production and the evolution of  
583 investment in a public good: An adaptive dynamics approach to kin selection. *J Theor Biol*  
584 388:61–71.
- 585 13. Lee W, van Baalen M, Jansen VAA (2012) An evolutionary mechanism for diversity in  
586 siderophore-producing bacteria. *Ecol Lett* 15(2):119–125.
- 587 14. Kümmerli R, Brown SP (2010) Molecular and regulatory properties of a public good shape  
588 the evolution of cooperation. *Proc Natl Acad Sci* 107(44):18921–18926.
- 589 15. Dumas Z, Kummerli R (2011) Cost of cooperation rules selection for cheats in bacterial  
590 metapopulations. *J Evol Biol* 25(3):473–484.
- 591 16. Seyedsayamdost MR, Traxler MF, Zheng S, Kolter R, Clardy J (2011) Structure and  
592 Biosynthesis of Amychelin, an Unusual Mixed-Ligand Siderophore from *Amycolatopsis* sp.  
593 AA4. *J Am Chem Soc* 133:11434–11437.
- 594 17. Challis GL, Hopwood DA (2003) Synergy and contingency as driving forces for the

- 595 evolution of multiple secondary metabolite production by Streptomyces species. *Proc*  
596 *Natl Acad Sci* 100(2):14555–14561.
- 597 18. Seyedsayamdost MR, et al. (2012) Mixing and matching siderophore clusters: structure  
598 and biosynthesis of serratiochelins from Serratia sp. V4. *J Am Chem Soc* 134(33):13550–3.
- 599 19. Griffiths GL, Sigel SP, Payne SM, Neilands JB (1984) Vibriobactin, a siderophore from  
600 *Vibrio cholerae*. *J Biol Chem* 259(1):383–385.
- 601 20. Okujo N, et al. (1994) Structure of vulnibactin, a new polyamine-containing siderophore  
602 from *Vibrio vulnificus*. *Biometals* 7(2):109–116.
- 603 21. Ciche TA, Blackburn M, Carney JR, Ensign JC (2003) Photobactin: a Catechol Siderophore  
604 Produced by *Photobacterium luminescens*, an Entomopathogen Mutually Associated with  
605 *Heterorhabditis bacteriophora* NC1 Nematodes. *Society* 69(8):4706–4713.
- 606 22. Bergeron RJ, Dionis JB, Elliott GT, Kline SJ (1985) Mechanism and stereospecificity of the  
607 parabactin-mediated iron-transport system in *Paracoccus denitrificans*. *J Biol Chem*  
608 260(13):7936–7944.
- 609 23. Ong SA, Peterson T, Neilands JB (1979) Agrobactin, a siderophores from *Agrobacterium*  
610 *tumefaciens*. *J Biol Chem* 254(6):1860–1865.
- 611 24. Fuell C, Elliott KA, Hanfrey CC, Franceschetti M, Michael AJ (2010) Polyamine biosynthetic  
612 diversity in plants and algae. *Plant Physiol Biochem* 48(7):513–520.
- 613 25. Lee J, et al. (2009) An alternative polyamine biosynthetic pathway is widespread in  
614 bacteria and essential for biofilm formation in *Vibrio cholerae*. *J Biol Chem* 284(15):9899–  
615 9907.
- 616 26. Pegg AE (2010) Mammalian Polyamine Metabolism and Function. *Int Union Biochem Mol*  
617 *Biol Life J* 61(9):880–894.
- 618 27. Keating T a, Marshall CG, Walsh CT, Keating AE (2002) The structure of VibH represents  
619 nonribosomal peptide synthetase condensation, cyclization and epimerization domains.  
620 *Nat Struct Biol* 9(7):522–526.

- 621 28. Keating TA, Marshall CG, Walsh CT (2000) Vibriobactin biosynthesis in *Vibrio cholerae*:  
622 VibH is an amide synthase homologous to nonribosomal peptide synthetase  
623 condensation domains. *Biochemistry* 39(50):15513–21.
- 624 29. Rondon MR, Ballering KS, Thomas MG (2004) Identification and analysis of a siderophore  
625 biosynthetic gene cluster from *Agrobacterium tumefaciens* C58. *Microbiology* 150(Pt  
626 11):3857–66.
- 627 30. Masschelein J, et al. (2013) A PKS/NRPS/FAS Hybrid Gene Cluster from *Serratia*  
628 *plymuthica* RVH1 Encoding the Biosynthesis of Three Broad Spectrum, Zeamine-  
629 Related Antibiotics. *PLoS One* 8(1):e54143.
- 630 31. Zhou J, et al. (2011) A novel multidomain polyketide synthase is essential for Zeamine  
631 production and the virulence of *Dickeya zeae*. *Mol Plant Microbe Interact* 24(10):1156–  
632 64.
- 633 32. Pollack JR, Neilands JB (1970) Enterobactin, an iron transport compound from *Salmonella*  
634 *typhimurium*. *Biochem Biophys Res Commun* 38(5):989–992.
- 635 33. O’Brien, I G, Cox GB, Gibson F (1970) Biologically active compounds containing 2,3-  
636 dihydroxybenzoic acid and serine formed by *Escherichia coli*. *Biochim Biophys Acta*  
637 201(3):453–60.
- 638 34. De Lorenzo V, Bindereif A, Paw BH, Neilands JB (1986) Aerobactin biosynthesis and  
639 transport genes of plasmid colV-K30 in *Escherichia coli* K-12. *J Bacteriol* 165(2):570–578.
- 640 35. Sikora AL, Wilson DJ, Aldrich CC, Blanchard JS (2010) Kinetic and inhibition studies of  
641 dihydroxybenzoate-AMP ligase from *Escherichia coli*. *Biochemistry* 49(17):3648–3657.
- 642 36. Chae TU, Kim WJ, Choi S, Park SJ, Lee SY (2015) Metabolic engineering of *Escherichia coli*  
643 for the production of 1, 3-diaminopropane, a three carbon diamine. *Sci Rep* 5(13040):1–  
644 13.
- 645 37. Corneillie S, Smet M (2015) Polymer Chemistry PLA architectures : the role of branching.  
646 *Polym Chem* 6:850–867.

- 647 38. Elvers B ed. (2016) *Ullmann's Polymers and Plastics: Products and Processes* (Wiley-VCH,  
648 Germany).
- 649 39. Bartkowiak M, Lewandowski G, Milchert E, Pelech R (2006) Optimization of 1, 2-  
650 Diaminopropane Preparation by the Ammonolysis of Waste. *Ind Eng Chem Res*  
651 45(16):5681–5687.
- 652 40. Lawrence S (2004) *Amines: synthesis, properties and applications* (Cambridge Press  
653 University, Cambridge, UK).
- 654 41. Caspi R, et al. (2014) The MetaCyc database of metabolic pathways and enzymes and the  
655 BioCyc collection of Pathway/Genome Databases. *Nucleic Acids Res* 42(D1):459–471.
- 656 42. Shah P, Swiatlo E (2008) A multifaceted role for polyamines in bacterial pathogens. *Mol*  
657 *Microbiol* 68(1):4–16.
- 658 43. Weaver RH, Herbst EJ (1957) Metabolism of diamines and polyamines in microorganisms.  
659 *J Biol Chem* 231:637–646.
- 660 44. Stevens BL, Marcelle A (1968) Studies on the Role of Polyamines Associated with the  
661 Ribosomes from *Bacillus stearothermophilus*. *J Biochem* 108:633–640.
- 662 45. Minguet EG, Vera-Sirera F, Marina A, Carbonell J, Blázquez MA (2008) Evolutionary  
663 Diversification in Polyamine Biosynthesis. *Mol Biol Evol* 25(10):2119–2128.
- 664 46. Michael AJ (2016) Polyamines in eukaryotes, bacteria, and archaea. *J Biol Chem*  
665 291(29):14896–14903.
- 666 47. Tabor CW, Tabor H (1985) Polyamines in microorganisms. *Microbiol Rev* 49(1):81–99.
- 667 48. Busse J, Auling G (1988) Polyamine Pattern as a Chemotaxonomic Marker within the  
668 Proteobacteria. *Syst Appl Microbiol* 11(1):1–8.
- 669 49. Kim SH, et al. (2016) The essential role of spermidine in growth of *Agrobacterium*  
670 *tumefaciens* is determined by the 1,3-diaminopropane moiety. *ACS Chem Biol* 11(1):491–  
671 499.



- 672 50. Webster ACD, Litwin CM (2000) Cloning and Characterization of *vuuA*, a Gene Encoding  
673 the *Vibrio vulnificus* Ferric Vulnibactin Receptor Cloning and Characterization of *vuuA*, a  
674 Gene Encoding the *Vibrio vulnificus* Ferric Vulnibactin Receptor. *Society* 68(2):526–534.
- 675 51. Skare JT, Ahmer BMM, Seachord CL, Darveau RP, Postle K (1993) Energy Transduction  
676 between Membranes - TonB, a cytoplasmic membrane protein, can be chemically cross-  
677 linked in vivo to the outer membrane receptor FepA. *J Biol Chem* 268(22):16302–16308.
- 678 52. Torres AG, Redford P, Welch RA, Payne SM (2001) TonB-dependent systems of  
679 uropathogenic *Escherichia coli*: Aerobactin and heme transport and TonB are required  
680 for virulence in the mouse. *Infect Immun* 69(10):6179–6185.
- 681 53. Griggs DW, Tharp BB, Konisky J (1987) Cloning and promoter identification of the iron-  
682 regulated *cir* gene of *Escherichia coli*. *J Bacteriol* 169(12):5343–5352.
- 683 54. McIntosh MA, Earhart CF (1977) Coordinate Regulation by Iron of the Synthesis of  
684 Phenolate Compounds and Three Outer Membrane Proteins in *Escherichia coli*.  
685 131(1):331–339.
- 686 55. Bosák J, Laiblová P, Šmarda J, Dědičová D, Šmajš D (2012) Novel colicin FY of *Yersinia*  
687 *frederiksenii* inhibits pathogenic *Yersinia* strains via YiuR-mediated reception, TonB  
688 import, and cell membrane pore formation. *J Bacteriol* 194(8):1950–1959.
- 689 56. Goldberg MB, et al. (1992) Characterization of a *Vibrio cholerae* virulence factor  
690 homologous to the family of TonB-dependent proteins. *Mol Microbiol* 6(16):2407–2418.
- 691 57. Hantke K (1983) Identification of an iron uptake system specific for coprogen and  
692 rhodotorulic acid in *Escherichia coli* K12. *MGG Mol Gen Genet* 191(2):301–306.
- 693 58. Koster M, van de Vossen J, Leong J, Weisbeek PJ (1993) Identification and  
694 characterization of the *pupB* gene encoding an inducible ferric-pseudobactin receptor of  
695 *Pseudomonas putida* WCS358. *Mol Microbiol* 8(3):591–601.
- 696 59. Coulton JW, Mason P, DuBow M (1983) Molecular Cloning of the Ferrichrome-Iron  
697 Receptor of *Escherichia coli*. *J Bacteriol* 156(3):1315–1321.

- 698 60. Cope LD, Yogev RAM, Muller-eberhard U, Hansen EJ (1995) A Gene Cluster Involved in  
699 the Utilization of Both Free Heme and Heme : Hemopexin by *Haemophilus influenzae*  
700 Type b. *J Bacteriology* 177(10):2644–2653.
- 701 61. Hornung JM, Jones HA, Perry RD (1996) The hmu locus of *Yersinia pestis* is essential for  
702 utilization of free haemin and haem-protein complexes as iron sources. *Mol Microbiol*  
703 20(4):725–739.
- 704 62. Stojiljkovic I, Hantke K (1992) Hemin uptake system of *Yersinia enterocolitica*: similarities  
705 with other TonB-dependent systems in gram-negative bacteria. *EMBO J* 11(12):4359–  
706 4367.
- 707 63. Gudmondottir A, Bradbeer C, Kadner RJ (1988) Altered binding and transport of  
708 vitamin B12 resulting from insertion mutations in the *Escherichia coli* btuB gene. *J Biol*  
709 *Chem* 263(28):14224–14230.
- 710 64. Armstrong SK, Brickman TJ, Suhadolc RJ (2012) Involvement of multiple distinct  
711 Bordetella receptor proteins in the utilization of iron liberated from transferrin by host  
712 catecholamine stress hormones. *Mol Microbiol* 84(3):446–462.
- 713 65. Nielsen A, et al. (2012) Nigribactin, a novel siderophore from *Vibrio nigripulchritudo*,  
714 modulates *Staphylococcus aureus* virulence gene expression. *Mar Drugs* 10(11):2584–  
715 2595.
- 716 66. Yamamoto S, et al. (1993) Structures of Two Polyamine-Containing from *Vibrio fluvialis*  
717 Catecholate Siderophores. *J Biochem* 544:538–544.
- 718 67. Ehlert G, Taraz K, Budzikiewicz H (1994) Serratiochelin, a New Catecholate Siderophore  
719 from *Serratia marcescens*. *Zeitschrift fur Naturforsch - Sect C J Biosci* 49(1–2):11–17.
- 720 68. Peterson T, Neilands JB (1979) Revised structure of a catecholamide spermidine  
721 siderophore. From *Paracoccus denitrificans*. *Tetrahedron Lett* 20(50):4805–4808.
- 722 69. González Carreró MI, Sangari FJ, Agüero J, García Lobo JM (2002) *Brucella abortus* strain  
723 2308 produces brucebactin, a highly efficient catecholic siderophore. *Microbiology*  
724 148(2):353–360.

- 725 70. Bloudoff K, Alonzo DA, Schmeing TM (2016) Chemical Probes Allow Structural Insight into  
726 the Condensation Reaction of Nonribosomal Peptide Synthetases. *Cell Chem Biol*  
727 23(3):331–339.
- 728 71. Rausch C, Hoof I, Weber T, Wohlleben W, Huson DH (2007) Phylogenetic analysis of  
729 condensation domains in NRPS sheds light on their functional evolution. *BMC Evol Biol*  
730 7:78.
- 731 72. Weinberg ED (2009) Iron availability and infection. *Biochim Biophys Acta - Gen Subj*  
732 1790(7):600–605.
- 733 73. Lawlor MS, O'Connor C, Miller VL (2007) Yersiniabactin is a virulence factor for *Klebsiella*  
734 *pneumoniae* during pulmonary infection. *Infect Immun* 75(3):1463–1472.
- 735 74. Chaturvedi KS, Hung CS, Crowley JR, Stapleton AE, Henderson JP (2012) The siderophore  
736 yersiniabactin binds copper to protect pathogens during infection. *Nat Chem Biol*  
737 8(8):731–6.
- 738 75. Skaar EP (2010) The battle for iron between bacterial pathogens and their vertebrate  
739 hosts. *PLoS Pathog* 6(8):1–2.
- 740 76. Carrero P, et al. (1995) Report of six cases of human infection by *Serratia plymuthica*. *J*  
741 *Clin Microbiol* 33(2):275–6.
- 742 77. Domingo D, et al. (1994) Nosocomial septicemia caused by *Serratia plymuthica*. *J Clin*  
743 *Microbiol* 32(2):575–577.
- 744 78. Horowitz HW, et al. (1987) *Serratia-Plymuthica* Sepsis Associated With Infection of  
745 Central Venous Catheter. *J Clin Microbiol* 25(8):1562–1563.
- 746 79. Fischbach M a, Walsh CT, Clardy J (2008) The evolution of gene collectives: How natural  
747 selection drives chemical innovation. *Proc Natl Acad Sci U S A* 105(12):4601–4608.
- 748 80. Watts RE, et al. (2012) Contribution of siderophore systems to growth and urinary tract  
749 colonization of asymptomatic bacteriuria *Escherichia coli*. *Infect Immun* 80(1):333–344.
- 750 81. Fischbach MA, Walsh CT (2006) Assembly-line enzymology for polyketide and

- 751 nonribosomal Peptide antibiotics: logic, machinery, and mechanisms. *Chem Rev*  
752 106(8):3468–3496.
- 753 82. Harris WR, et al. (1979) Coordination Chemistry of Microbial Iron Transport Compounds.  
754 19. Stability Constants and Electrochemical Behavior of Ferric Enterobactin and Model  
755 Complexes. *J Am Chem Soc* 101(10):6097–6104.
- 756 83. Hamana K, Matsuzaki S (1992) Diaminopropane occurs ubiquitously in Acinetobacter as  
757 the major polyamine. *J Gen Appl Microbiol* 38(2):191–194.
- 758 84. Minguet EG, Vera-Sirera F, Marina A, Carbonell J, Blázquez MA (2008) Evolutionary  
759 diversification in polyamine biosynthesis. *Mol Biol Evol* 25(10):2119–2128.
- 760 85. Michael AJ (2016) Biosynthesis of polyamines and polyamine-containing molecules.  
761 *Biochem J* 473(15):2315–2329.
- 762 86. Smith CA, Want EJ, Maille GO, Abagyan R, Siuzdak G (2006) XCMS: Processing Mass  
763 Spectrometry Data for Metabolite Profiling Using Nonlinear Peak Alignment, Matching,  
764 and Identification. *78(3):779–787*.
- 765 87. Altschul SF, Gish W, Miller W, Myers EW, Lipman DJ (1990) Basic local alignment search  
766 tool. *J Mol Biol* 215(3):403–10.
- 767 88. Altschul SF, et al. (1997) Gapped BLAST and PSI-BLAST: A new generation of protein  
768 database search programs. *Nucleic Acids Res* 25(17):3389–3402.
- 769 89. Baba T, et al. (2006) Construction of Escherichia coli K-12 in-frame, single-gene knockout  
770 mutants: the Keio collection. *Mol Syst Biol* 2(1). doi:10.1038/msb4100050.
- 771 90. Bergeron RJ, Weimar WR (1991) Increase in spermine content coordinated with  
772 siderophore production in Paracoccus denitrificans. *J Bacteriol* 173(7):2238–2243.
- 773 91. Smith MA, Davies PJ (1985) Separation and Quantitation of Polyamines in Plant Tissue by  
774 High Performance Liquid Chromatography of Their Dansyl Derivatives. *Plant Physiol*  
775 1(78):89–91.
- 776 92. Qian ZG, Xia XX, Lee SY (2009) Metabolic engineering of Escherichia coli for the

- 777 production of putrescine: A four carbon diamine. *Biotechnol Bioeng* 104(4):651–662.
- 778 93. Stachelhaus T, Mootz HD, Bergendahl V, Marahiel M a (1998) Peptide Bond Formation in  
779 Nonribosomal Peptide Biosynthesis. *J Biol Chem* 273(35):22773–22781.
- 780 94. Rausch C, Hoof I, Weber T, Wohlleben W, Huson DH (2007) Phylogenetic analysis of  
781 condensation domains in NRPS sheds light on their functional evolution. *BMC Evol Biol*  
782 7:78.
- 783 95. Benkert P, Biasini M, Schwede T (2011) Toward the estimation of the absolute quality of  
784 individual protein structure models. *Bioinformatics* 27(3):343–350.
- 785 96. Biasini M, et al. (2014) SWISS-MODEL: Modelling protein tertiary and quaternary  
786 structure using evolutionary information. *Nucleic Acids Res* 42(W1):252–258.
- 787 97. Arnold K, Bordoli L, Kopp J, Schwede T (2006) The SWISS-MODEL workspace: A web-  
788 based environment for protein structure homology modelling. *Bioinformatics* 22(2):195–  
789 201.
- 790 98. Schrödinger, LLC (2015) *The {PyMOL} Molecular Graphics System, Version~1.8*.
- 791 99. Hider RC, Kong X (2010) Chemistry and biology of siderophores. *Nat Prod Rep* 27(5):637–  
792 657.
- 793 100. Weiss DS, Chen JC, Ghigo JM, Boyd D, Beckwith J (1999) Localization of FtsI (PBP3) to the  
794 septal ring requires its membrane anchor, the Z ring, FtsA, FtsQ, and FtsL. *J Bacteriol*  
795 181(2):508–520.
- 796

797 **Figures and Tables**

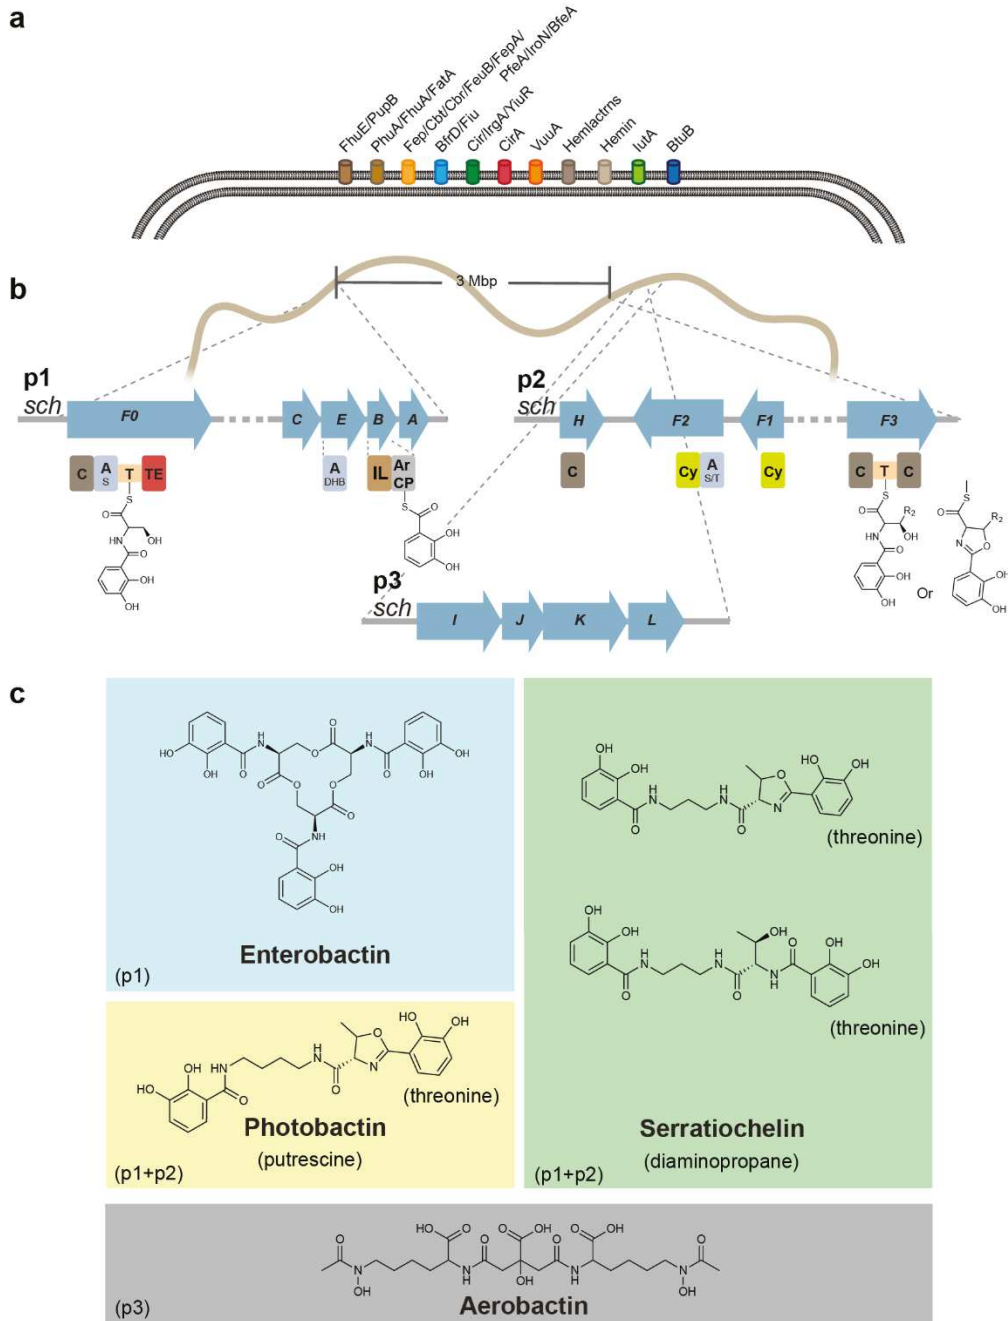

798  
 799 **Figure 1.** Schematic of the molecular players in the iron uptake mechanism of *S. plymuthica*.  
 800 Putative TonB-dependent siderophore uptake receptors identified in the *S. plymuthica* genome  
 801 (a); siderophore-encoding gene clusters (p1-p3) identified in the *S. plymuthica* genome and  
 802 experimentally characterized in this study (domain annotations below blue arrow:  
 803 C=condensation domain, A=adenylation domain (index indicates the substrate; 2,3-  
 804 dihydroxybenzoate (DHB), serine (S), threonine (T)), T=thiolation domain, IL=isochorismate lyase

805 ArCP=aryl carrier protein, TE=thioesterase domain, Cy=cyclisation domain, (b); siderophores  
806 detected in this study grouped by their underlying biosynthetic pathways (p1-p3)(c).

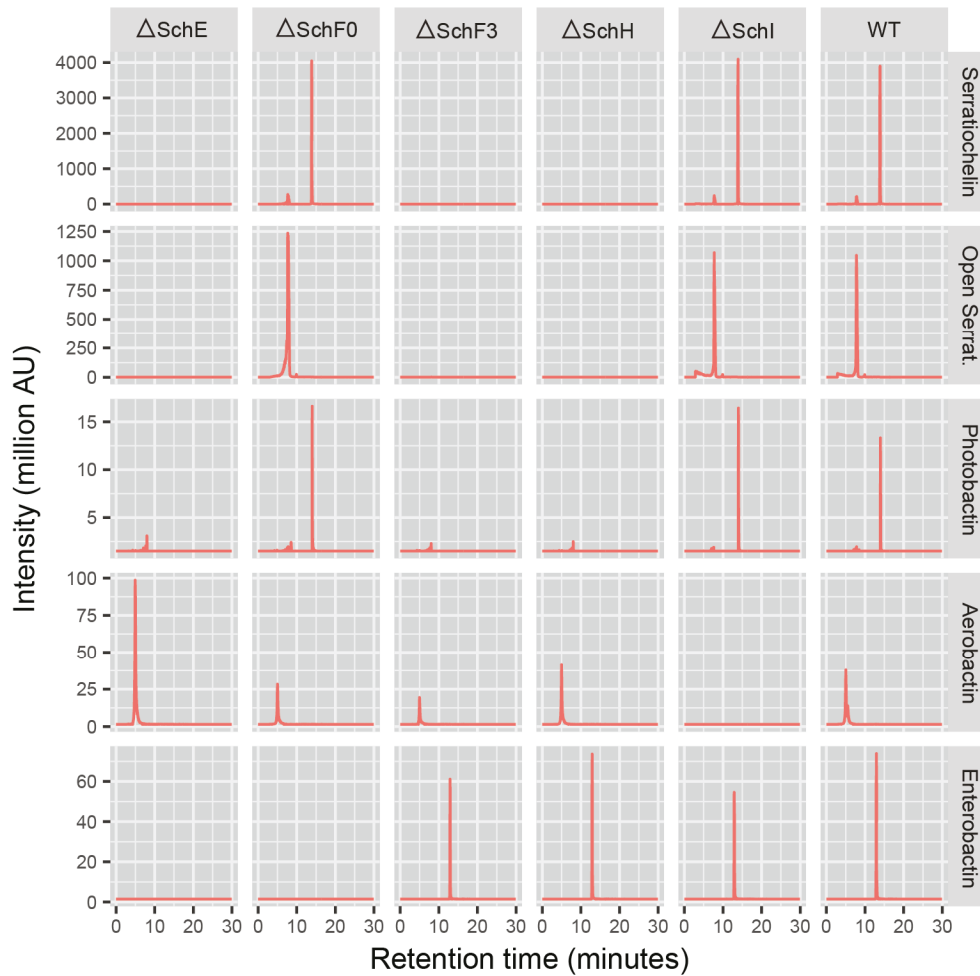

807

808

**Figure 2.** Extracted Ion Count in million activity units for serratiochelin (closed and open form),  
809 photobactin, aerobactin, and enterobactin in the *schE*, *schF0*, *schF3*, *schH*, *schI* mutants and the  
810 wild-type strain.

811





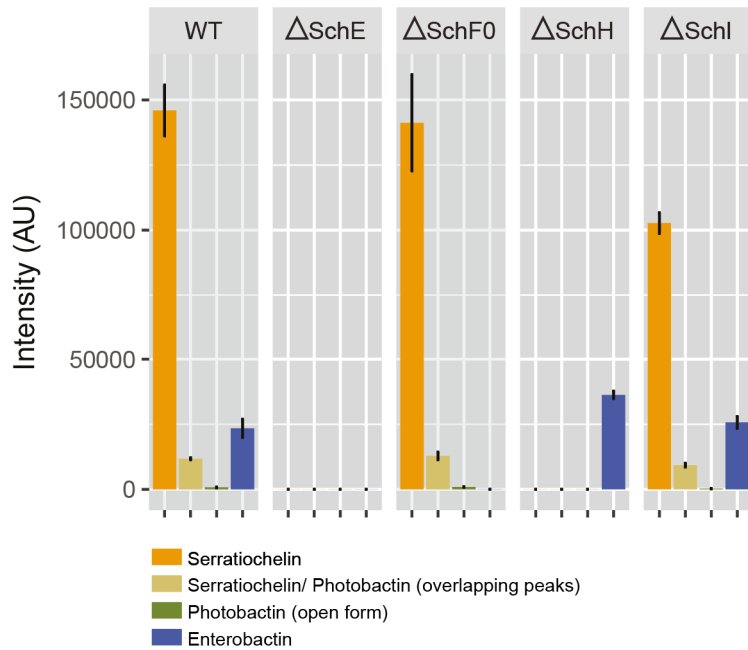

818

819 **Figure 4.** Relative abundance of serratiochelin, photobactin, and enterobactin in each mutant

820 and wild-type strain. The low abundance of aerobactin did not allow for its relative

821 quantification.

822

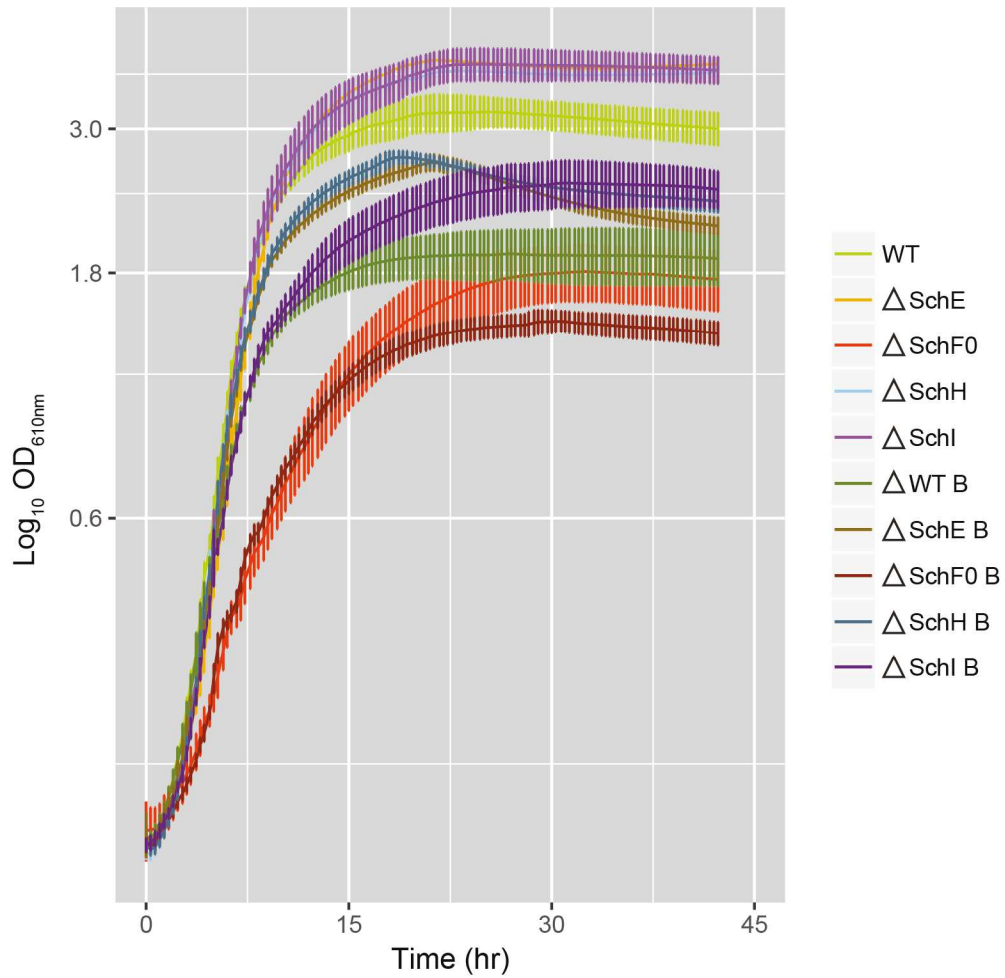

823  
824  
825  
826

**Figure 5.** Time course of the OD<sub>610nm</sub> for the mutant and wild-type strains, in the presence and absence of 0.1% bipyridyl (index B in the legend).

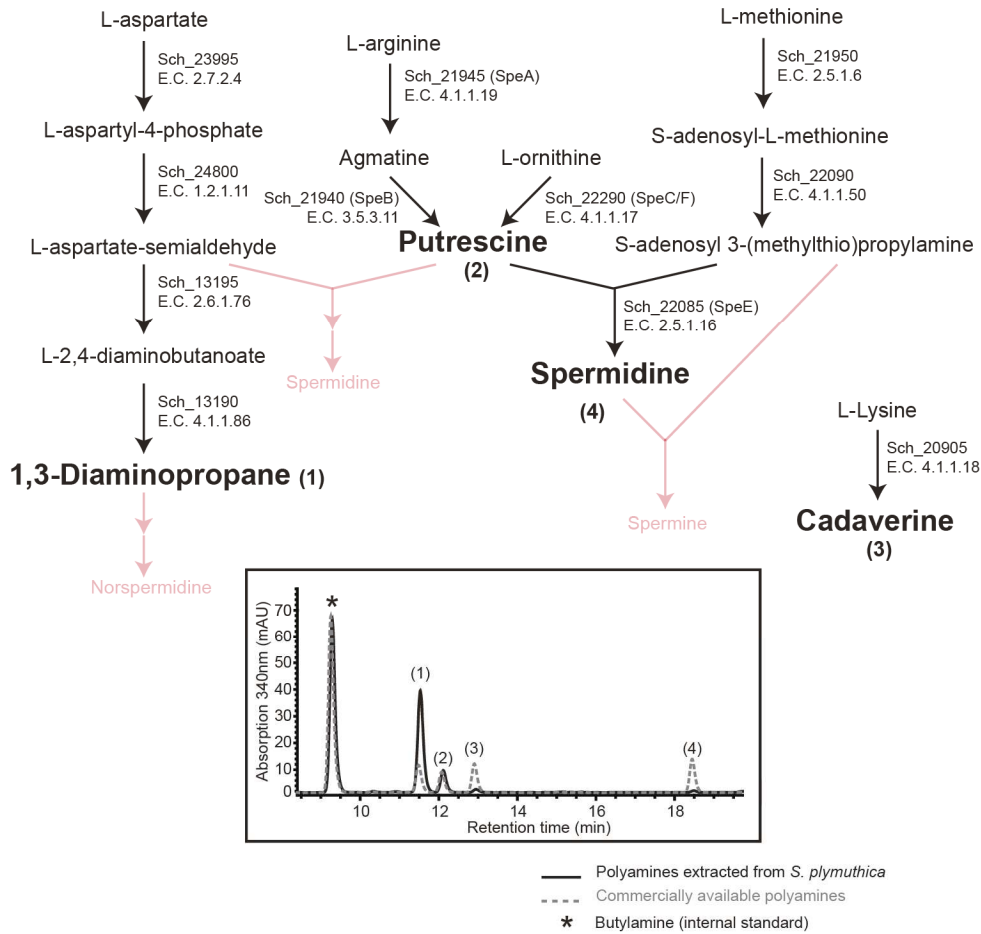

827

828

**Figure 6.** Proposed superpathway for polyamine production in *S. plymuthica* (top) and HPLC

829

trace for the *S. plymuthica* samples and authentic standards (bottom). Polyamines not produced

830

are displayed on the superpathway in red.

831

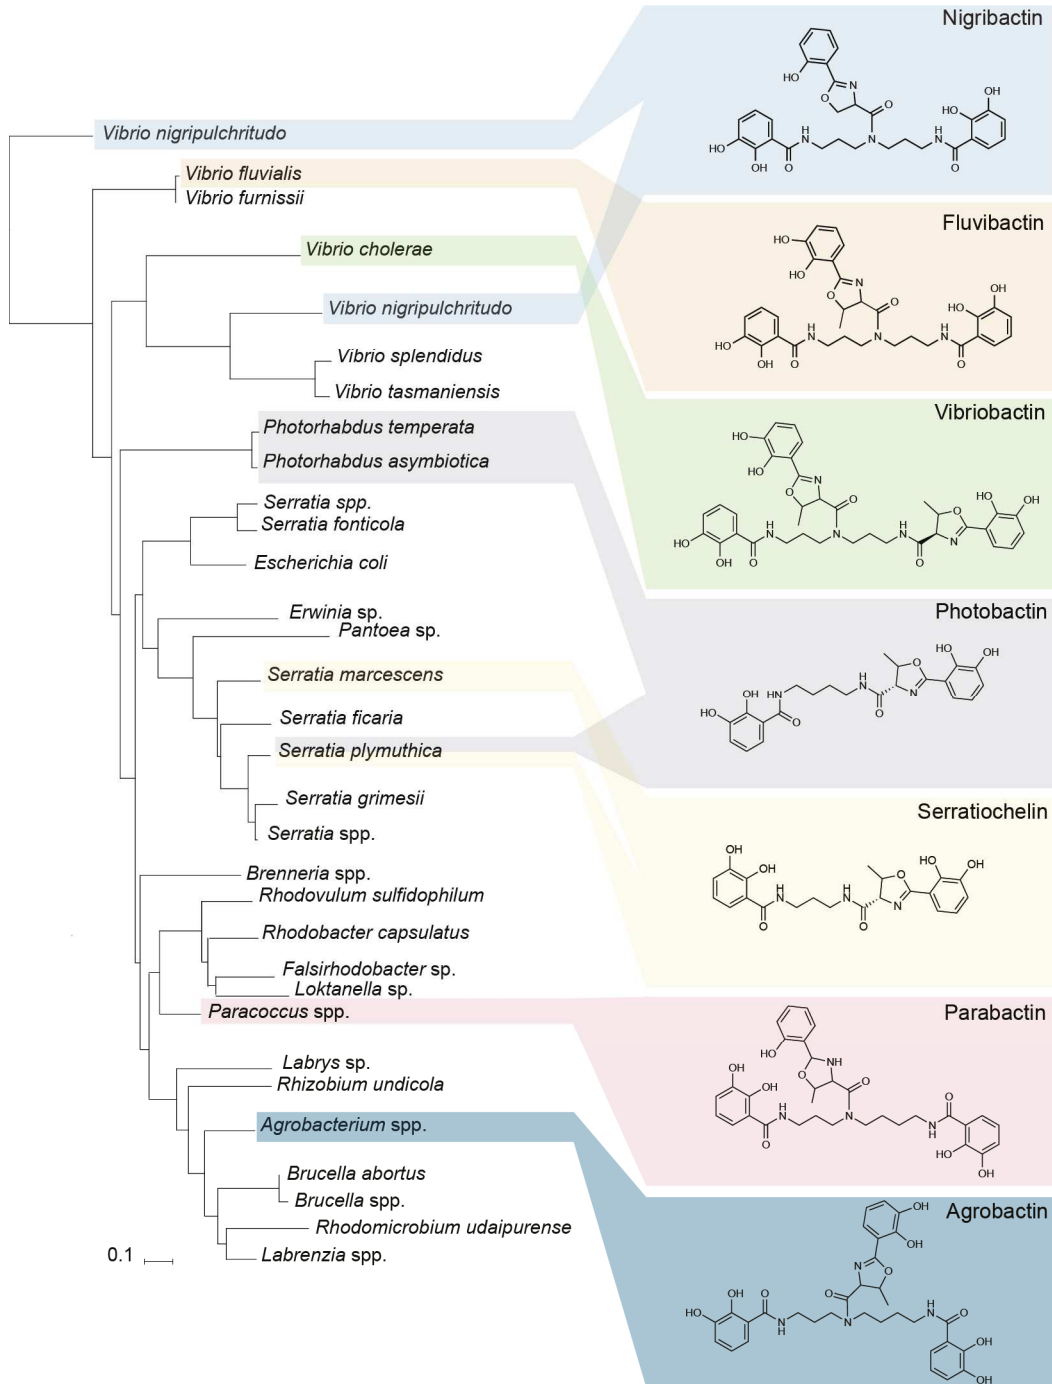

832

833

834

835

**Figure 7.** Phylogenetic tree for the distribution of amide synthases homologous to SchH across bacteria and their respective, known siderophores.

836 **Table 1.** Maximum growth rates and OD<sub>610nm</sub> of wild-type *S. plymuthica* and siderophore mutant  
837 strains grown in minimal medium, in the presence and absence of bipyridyl.

| Strain         | No bipyridyl        |           |                         | 0.1% bipyridyl      |           |                         |
|----------------|---------------------|-----------|-------------------------|---------------------|-----------|-------------------------|
|                | Maximum growth rate | Time (hr) | Max OD <sub>610nm</sub> | Maximum growth rate | Time (hr) | Max OD <sub>610nm</sub> |
| WT             | 0.307               | 25.0      | 3.202                   | 0.258               | 27.0      | 1.939                   |
| ΔSchE          | 0.295               | 21.7      | 3.805                   | 0.306               | 21.0      | 2.692                   |
| ΔSchFO         | 0.172               | 32.3      | 1.811                   | 0.229               | 30.3      | 1.490                   |
| ΔSchH          | 0.335               | 23.3      | 3.673                   | 0.338               | 19.0      | 2.741                   |
| ΔSchI          | 0.320               | 24.7      | 3.757                   | 0.296               | 31.0      | 2.505                   |
| WT pTrc        | 0.114               | 35.0      | 2.761                   | 0.118               | 44.7      | 1.874                   |
| ΔSchFO pTrc_F0 | 0.193               | 30.3      | 3.255                   | 0.192               | 34.0      | 2.690                   |

838

839 **Table 2.** Strains and plasmids used in this study.

| Strain and genotype                                                     | Phenotype                                                                        | Strain collection number | Reference        |
|-------------------------------------------------------------------------|----------------------------------------------------------------------------------|--------------------------|------------------|
| <i>S. plymuthica</i> V4                                                 | Wild type                                                                        | ZK4911                   | (18)             |
| <i>S. plymuthica</i> V4<br><i>schE</i> ::GntR                           | Catecholate siderophore deficient                                                | ZK4952                   |                  |
| <i>S. plymuthica</i> V4<br><i>schF0</i> ::GntR                          | Enterobactin deficient                                                           | ZK4962                   |                  |
| <i>S. plymuthica</i> V4<br><i>schF3</i> ::GntR                          | Polyamine-containing siderophore deficient                                       | ZK4987                   |                  |
| <i>S. plymuthica</i> V4<br><i>schH</i> ::GntR                           | Polyamine-containing siderophore deficient                                       | ZK4984                   |                  |
| <i>S. plymuthica</i> V4<br><i>schI</i> ::GntR                           | Aerobactin deficient                                                             | SA921                    | This study       |
| <i>S. plymuthica</i> V4<br><i>schF0</i> ::GntR<br>pTrc99A_ <i>schF0</i> | <i>S. plymuthica</i> V4<br><i>schF0</i> ::GntR carrying<br>pTrc99A_ <i>schF0</i> | SA956                    | This study       |
| <i>S. plymuthica</i> V4<br><i>schF0</i> ::GntR pTrc99A                  | <i>S. plymuthica</i> V4<br><i>schF0</i> ::GntR carrying<br>pTrc99A               | SA958                    | This study       |
| <i>S. plymuthica</i> V4<br>pTRC99                                       | <i>S. plymuthica</i> carrying<br>pTRC99_ <i>schF0</i>                            | SA960                    | This study       |
| <i>S. plymuthica</i> V4<br><i>sch_13190</i> ::GntR                      | DAP defective;<br>Sch_131390 mutant                                              | SA976                    | This study       |
| <i>S. plymuthica</i> V4<br><i>sch_13195</i> ::GntR                      | DAP defective;<br>Sch_131395 mutant                                              | SA977                    | This study       |
| <i>S. plymuthica</i> V4<br><i>sch_20905</i> ::GntR                      | Cadaverine defective;<br>Sch_20905 mutant                                        | SA970                    | This study       |
| <i>S. plymuthica</i> V4<br><i>sch_21940</i> ::GntR                      | Putrescine defective;<br>Sch_21940 mutant                                        | SA974                    | This study       |
| <i>S. plymuthica</i> V4<br><i>sch_21945</i> ::GntR                      | Putrescine defective;<br>Sch_21945 mutant                                        | SA975                    | This study       |
| <i>S. plymuthica</i> V4<br><i>sch_22085</i> ::GntR                      | Spermidine defective;<br>Sch_22085 mutant                                        | SA972                    | This study       |
| <i>S. plymuthica</i> V4<br><i>sch_22090</i> ::GntR                      | Spermidine defective;<br>Sch_22090 mutant                                        | SA971                    | This study       |
| <i>S. plymuthica</i> V4<br><i>sch_22290</i> ::GntR                      | Putrescine defective;<br>Sch_22290 mutant                                        | SA973                    | This study       |
| <b>Plasmid</b>                                                          | <b>Genotype</b>                                                                  | <b>Reference number</b>  | <b>Reference</b> |
| pBTK30                                                                  | R6K ori and Gen <sup>r</sup><br>cassette                                         | -                        | (99)             |
| pSC30A                                                                  | pBTK30 with a 600 bp<br>fragment of <i>schI</i><br>cloned between Stul           | SA918                    | This study       |

|               |                                                          |       |            |
|---------------|----------------------------------------------------------|-------|------------|
|               | and SpeI, which replaces Mariner C9 and Amp <sup>r</sup> |       |            |
| pTrc99A       | IPTG-inducible expression vector, Amp <sup>r</sup>       | -     | (100)      |
| pTrc99A_schF0 | pTrc99A carrying <i>schF0</i> between NcoI and XbaI      | SA956 | This study |

840
